# Supplementary material for: Metabolic Resistance in Abamectin-Resistant Bemisia tabaci Mediterranean from Northern China
Source: MDPI journal article supplement (doi:10.3390/toxins14070424), 2022-06-22
Supplement: s1 [file s1]

# Metabolic Resistance in Abamectin-Resistant *Bemisia tabaci* Mediterranean from Northern China

Ran Wang, Yong Fang, Wunan Che, Qinghe Zhang, Jinda Wang and Chen Luo

**Table S1.** Information of field-collected *Bemisia tabaci* samples from northern China.

| Names of populations | Locations of collection | Sites of collection | Date      | Host plant |
|----------------------|-------------------------|---------------------|-----------|------------|
| LY                   | Liaoyang, Liaoning      | 41.19N, 123.11E     | Aug 2021  | Eggplant   |
| CY                   | Chaoyang, Liaoning      | 41.59N, 120.50E     | Aug 2021  | Cucumber   |
| HD                   | Haidian, Beijing        | 39.97N, 116.31E     | Apr 2021  | Tomato     |
| TZ                   | Tongzhou, Beijing       | 39.73N, 116.69E     | Jun 2021  | Tomato     |
| WQ                   | Wuqing, Tianjin         | 39.35N, 117.10E     | Jun 2021  | Tomato     |
| JH                   | Jinghai, Tianjin        | 38.90N, 116.94E     | Jun 2021  | Tomato     |
| ZJK                  | Zhangjiakou, Hebei      | 40.58N, 115.00E     | July 2021 | Pepper     |
| BD                   | Baoding, Hebei          | 38.82N, 115.39E     | July 2021 | Tomato     |
| ZZ                   | Zhengzhou, Henan        | 34.91N, 113.56E     | July 2021 | Cucumber   |
| XZ                   | Xinzheng, Henan         | 34.33N, 113.75E     | July 2021 | Pepper     |
| JN                   | Jinan, Shandong         | 36.78N, 117.23E     | Aug 2021  | Tomato     |
| TA                   | Taian, Shandong         | 36.14N, 117.22E     | Aug 2021  | Tomato     |
